# Supplementary material for: Quantifying Variation in Soybean Due to Flood Using a Low-Cost 3D Imaging System
Source: Sensors (Basel). 2019 Jun 13;19(12):2682. doi: 10.3390/s19122682 (PMC6630946; doi:10.3390/s19122682)
Supplement: Supplementary file 1 [file sensors-19-02682-s001.xlsx]

## Sheet: Sheet1
	Item name	unit price	unit	total
	Hardware
	Arduino Uno - R3	17.95	1	17.95		https://www.amazon.com/Arduino-A000066-ARDUINO-UNO-R3/dp/B008GRTSV6
	stepper motor	38	1	38		https://www.amazon.com/Stepper-Motor-Bipolar-269oz-Router/dp/B00PNEPI0A
	motor driver	39.99	1	39.99		https://www.amazon.com/SainSmart-Micro-Stepping-Stepper-Driver-ST-M5045/dp/B00DFSF9GE
	Aluminum extrusion (10 ft)	57	1	57		https://www.mcmaster.com/aluminum-extrusions
	Pillow Block Bearing (2)	17.88	1	17.88		https://www.amazon.com/Jeremywell-Pieces-UCP205-16-Bearing-Self-Alignment/dp/B01IWGLPF2
	Camera arm and mount	20	1	20		Local hardware store
	Digital camera	179	1	179		https://www.amazon.com/Canon-PowerShot-Digital-Optical-Stabilization/dp/B01AA093UW?th=1
	Subtotal			369.82
	Software (can be replaced by other programs)
	Agisoft education	500	1	500
	Matlab Student	100	1	100
				0
				600
